# Supplementary material
Source: PubMed Central journal article supplement (PMC7265875)

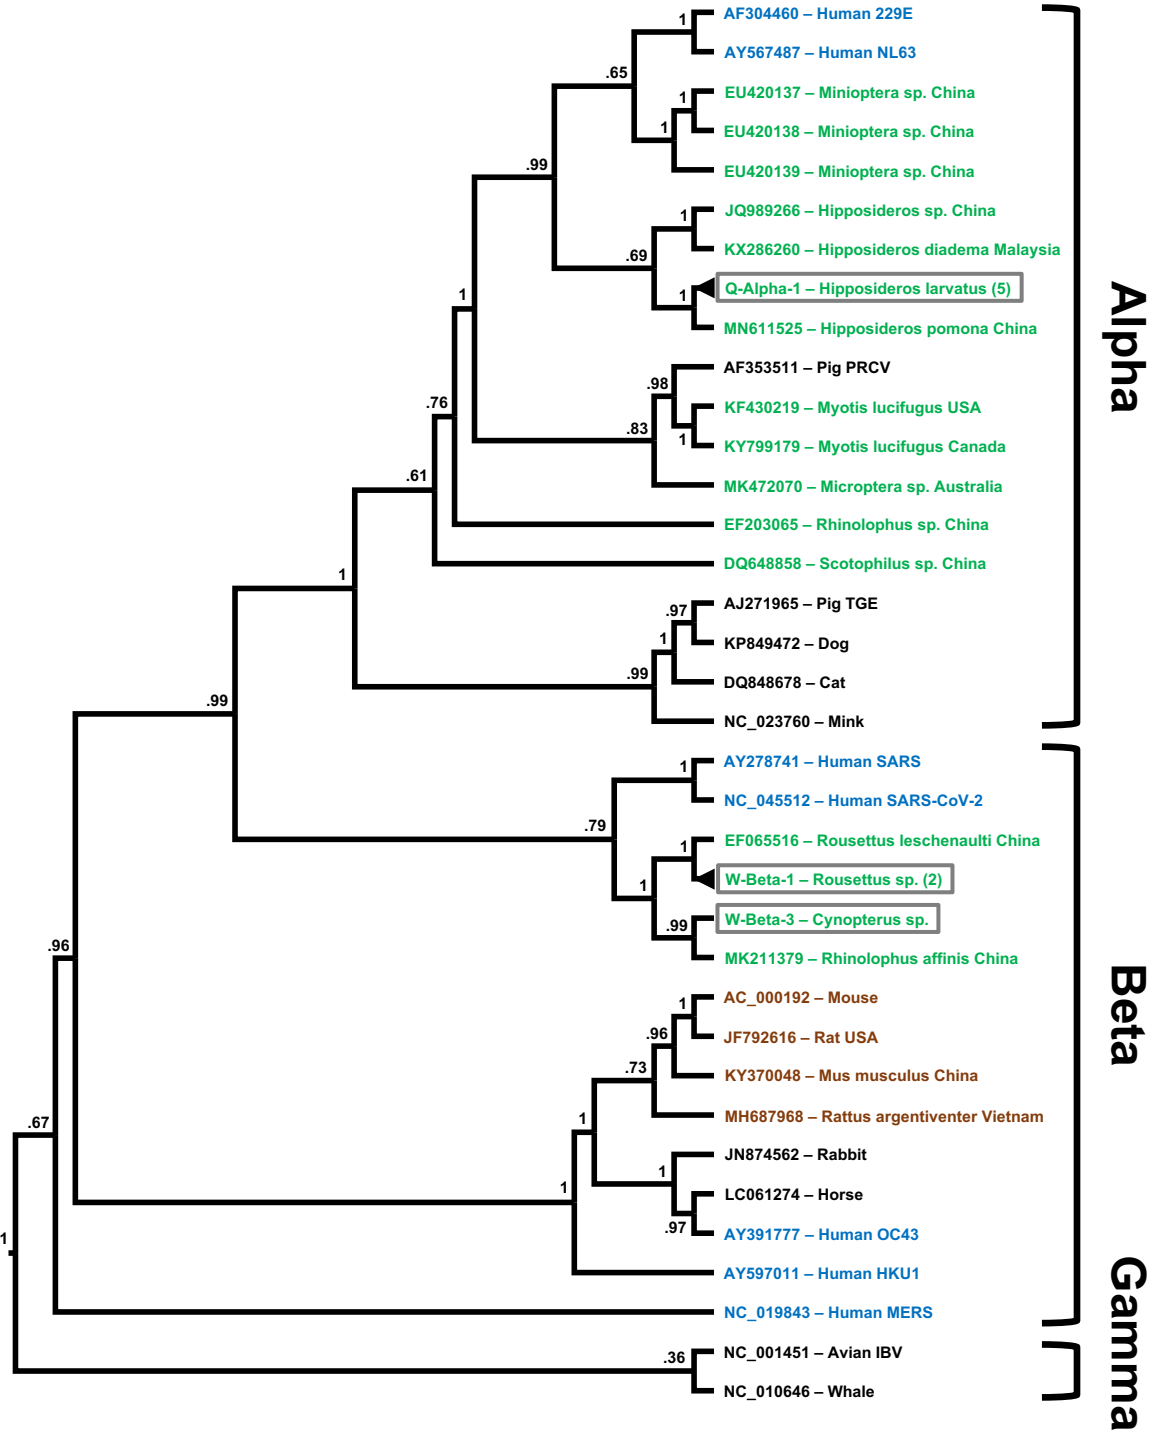

Supplement: 705_2020_4683_MOESM2_ESM.pdf [file 705_2020_4683_MOESM2_ESM.pdf]
